# Supplementary material for: So alike yet so different. Differential expression of the long non-coding RNAs NORAD and HCG11 in breast cancer subtypes
Source: PubMed Central journal article supplement (PMC7976429; doi:10.1590/1678-4685-gmb-2020-0153), 2021-03-19
Supplement: 1415-4757-GMB-44-1-e20200153-s1.pdf [file 1415-4757-GMB-44-1-e20200153-s1.pdf]

## Supplementary Material to “So alike yet so different. Differential expression of the long non-coding RNAs NORAD and HCG11 in breast cancer subtypes.”

**Figure S1** - CLUSTAL sequence alignment of NORAD and HCG11. The Pumilio Recognition Element (PRE) sequences are highlighted in blue.

### CLUSTAL sequence alignment of NORAD and HCG11 by Kalign (2.0)

```
NORAD -----AGTTCGGTCCGGCAGAGATCGCGGAGAGACGCAGAACGCAGCCCCTCTCT
HCG11  CACTGCAAGAGTTCCGGTCTGGCAGAGAGCGCGGAGAGACGCAGAGCGCGGGCCCTCTCT

NORAD  CCAGGGCCTCCAGGCCCTCCGGCCCCGGGCGCGGGTGAAGTGGGGGGC--CCCGGA
HCG11  CCAGGGCGCTCCAGGCCCTCCGGCCCCGGGTGCGCGGGTGAAGTGGGGGGC--CCCGGA

NORAD  CAGGCCGAGCCCTCTGCCCTGCAGATAACGGAGGCCTCTGCTGTGGCTGCCACTGGCTG
HCG11  CAGGCCGCGCCCTCTGCCCTGCAGATAACGGAGGCCTCTGCTGTGGCT-----

NORAD  TGCCCCCCACTGGCTGTGCCAGACCTTGAAGCCGCAGCGAACCTCTCTTTCCACCCC
HCG11  ----GCCACTGGCTGGGCCAGGCCTTGAAGCGGTGGCGAACGTCTCTTCCCTACCT

NORAD  ACCTCGGTGACTAATGGCGGCCGTGGCGTCTCCAGCCCGGACCCCGCCGGCACCCGGGT
HCG11  ACCTCGGTGACTGATGGCGGCCGGCGCCTCTCCAGTCCGGACCCTGCCGGCCGTCCGGT

NORAD  CTCCCGACCCAA-----GCCTCGACGAAACCCCGCAGAGCCCGGGACGCAGCG
HCG11  CTCCCGGCCAAAGCCTGCCGGGCTGGACGAAACCCCGCCGAGCAGCCTGGACGCAGCG

NORAD  CCTTTGGGCGCGCTGGGCGTGGTGGGCCGGGAAGTATGGCGGCAGCTCGAACCCGCGC
HCG11  CCTTTGGGTGGCGCGGGAGTAGCGTGCCGGGAAGCATGGCGGCCGCTCGAACCCGCGC

NORAD  GGGCGAGGCCATTAAGGCGTGGACGGCCCCGGGAAGGCGGCCTAGGGACGCAAGCAGGCTC
HCG11  GGGCGAGGCGTTAGGGCATGAGGGCCCCGGGAAGGCGGCCTAGGGACGCAGGCAGGCTC

NORAD  GGCCGCTCTTTAGGCCACGGAGCCGCGCAGATCCGGTTCGGGGTGACCACTCTGTCCG
HCG11  GGCCGCTCTTCAGGCCACGGAGCCGC-CAGATCTGGGTCCGGGGTGACCACTCTGTCCG

NORAD  CATTGGGCGAGACCTACCTAGTCCTGACGACAACGGACAAAGGCCTTAAGGGGCTGGAA
HCG11  CATTGGGCGAGACCTACCTAGTCCTAACGACAACGGACAAAGGCCTTAACGGGCTGGGA

NORAD  GGTGAGCGAAGTCCCGAACGACGACGGGTGGAACGGTTAGCGGCCATCGGGCGGTTGGTC
HCG11  GGTGAGCGAAGTCCCGAACGACGACGGGTGGAACGGTTAGCGGCCATCGGGCGGTTGGTC

NORAD  TTCATTCTACCAGACTTTGCTGTGCGGAAGAGAGAAAATGGTAGAATGACAGGCCACGTTTG
HCG11  TCCGTA CTACCAGACTTTGCTGTGCGGAAGAGACAAAATGGTAGAATGACAGGCCACGTTTG

NORAD  GCCCGTTGGAAATGCCACCACCCTCTGGGAAGATTTACTGGCCGTTTATGGAAGGCCTG
HCG11  GCCCGTTGGAAATGCCCTCCATCCTCTGGGAAGATTCACAGGCCGTTTACGGAAGGCCTG

NORAD  TGTATATAATATGAAAAAGCTGCTCTCAACTCCACCCCAACCTTTTAATAGAAAACATTT
HCG11  TGTATATAATATGAAAAAGCTGCTCTCAACTCCACCCCAACCTTTTAATAGAAAACATTT

NORAD  GTCACATCTAGCCCTTCTAGATGGAAAAGAGGTTGCCGACGTATGATAAAAATAGAGTTAGA
HCG11  GTCACATCTAGCCCTTCTAGATGGAAAAGAGGTTGCCGACGTATGATA----GAGTTAGA

NORAD  AAGTTACACATCTTGTAATTCTCATTGTGTTAAAAAGAAATCATAGAAAATACATGTCTT
HCG11  AAGTTACACATCTTGTAATTCTCATTGTGTTAAAAAGAAATCATAGAAAATACATGTCTT

NORAD  CTGGAGATGACTTTTGGAAATGGAGTTGTTAAGACGGCCTCTGGAAGCGATACGTCCACG
HCG11  CCGGAGTTGACTTTTGGAAACTGAGTTGTTA-GACGGCCTCTAGAAGCGATACGTTACG
```

NORAD TTTGTAAAGTGGGTTAGATGACATGGAGCTGGAAGACCTGAGAAGGAAGAGAAGAAGGTT  
HCG11 TTTGTTCAGTGGGTTAGATGACATGGAGCTCGAAGACCTGAGAAGGAAAAAAGAAGGTT

NORAD CTATGCTAGACTGGTCATATTTAGAAGACATTTTCATATTCTATCCATTGTTTTGTGTGC  
HCG11 CTATGCTAGACTGGTCATATTTAGAAGACATTTTCATATTCTATCCATTGTTTTGTGTGC

NORAD ATTTTATTCCTCACTACTGTGTTGACAATGCTAAGCTTTTTTGAATGTCTCT  
HCG11 ATTCGCTTCCTCACTACTATGTATGTAGTTGACAATGCTAAGCTTTTTTGAATGTCTAT

NORAD TCTTTTTAGATGTTCTGAAGTGCCTGATAT--GTAAAAATTAGAGGTAGCAAAATCACAT  
HCG11 TCTTTTTAGATATTCTGAAGTGTCTGATATATGTAAAAATTAGAGGTAGTAAAAACCACAT

NORAD TTTGTAATACTTTTTGTTACAATTCATAGGAAA--TATTTTTGGGGGGGAATGGCCAA  
HCG11 TTTGTAATACTTTTTGTTACAATTCATAGAAAATGTTGTTTTTTGGGGGGGAATGGCCAA

NORAD ATCACCTGTTGAGTAATACTCATTGTGTTTGTGCAGTGGTTCAGGGGAGGAGAGAGGAGG  
HCG11 ATCACCTGTTGAGTAATACTCATTGTGTTTGTGCAGTAGTTCAGGGGAGGAGAGAGGAGG

NORAD GGGAGGTGCAGAGAGCTCTATGCCATCCTGTTTACAGCGAGGCAAGATGAATCATTATGT  
HCG11 GGGAGGTGCAGAGAGCTCTATGCCATCCTGTTTACAGCGAGGCAAGATGAATCACTATGT

NORAD CTGTGCATTTTGTTTACTTATCTGTGTATATAAGGTACATAAAGGACAGACGAGTCCTA  
HCG11 CTGTGCATTTTGTTT---TATCTATGTATATAAGGTACATAAAGGACAAACGAGTCCTA  
NORAD ATTGACAACATCTAGTCTTTCTGGATGTTAAAGAGGTTGCCAGTGTATGACAAAAGTAGA  
HCG11 ATTTACAACATCTAGTCTTTCTGGATGTTAAAGAGGTTGCCAGTGTATAACAAAAGTAGA

NORAD GTTAGTAACTAATATATTTTGTACATTTTGTTTTACAAGTCTAGGAAAGATTGTCTTC  
HCG11 GTTAGTAACTAATATATTTTGTACATTTTGTTTTACAAGTCTAGGAAAGACTGTCTTC

NORAD TGAAAATTTGA-----TGTCTTCTGGGTTGATGGAGATGGGAAGGGTTCTAGGCCAGA  
HCG11 TGAAAATTTGAGCATTCTTGCCACTGGGTTGATGGAGATGGGAAGGGTTCTAGGCCAGA

NORAD ATGTTACATTTGGAAGACTCTTTCAAATTATAACTGTTGTTACATGTTTGCAGTTTATT  
HCG11 ATGTTACATTTGGAAGACTCTTTCAAATTATAACTGTTGTTACATGTTTGCAGTTTATT

NORAD CAAGACTGCTGT----ATACATAGTAGACAAATTAACTCCTTACTTGAAACATCTAGTCT  
HCG11 CGAGACTGCTGTGTTACATAGTAGACAAATTAACTCCTTACTTGAAACATTTAGACT

NORAD ATCTAGATGTTTAGAAGTGCCCGATGTATGTTAAATGTATAGGTAGTAAAATACCACTTT  
HCG11 ATCTAGATGTTTAGAAGTGCCCGATGTATATTTAAATGTAGAGGTAGTAAAATACCACTTT

NORAD GTAAATACTTTTTGCTAAAATTCATAGGAAATGCTTTTGGAAATTGAATTGTGAAGCCA  
HCG11 GTAAATACTTTTTGCTAAAATTCATAGGAAATGCTTTTGGAAATTGAATTGTGAAGCCA

NORAD CCTTTGTGAACAGTATAGTAATGTCTATACTTGTTCATAGTTTAGAGGAGGTAGGAGGG  
HCG11 CCTTTGTGAGCAGTATATTACTGTCTATACTTGTTCATAGTTTAGAGGAGGTAGGAGGG

NORAD AAGAAATTGCAAAAGGTAATATTACTAGTGTGTTTACTTGGACATTTTTCAGACACCAT  
HCG11 AAGAAATTGCAAAAGGTAATA-TGCTAGTGTGTTTACTTGGACATTTTTCAGACACCAT

NORAD TTTTCTATATGTTTGTGCATTTTGTTTTGTCTGTTATATAATGGACAAAT  
HCG11 TTTTCTGTATGTTTGTGCATTTTGTTTTGTCTGTTATATAATGGACAAAT

NORAD AGTCTAATTTTTCAACATCTAGTCTCTAGATGTTAAAGAGGTTGCCAGTGTATGACAAA  
HCG11 AGTCTAATTTTTCAACATCTAG-----AGGTTGCCAGTGTATGACAAA

NORAD GGAGTAAATTTAGCATATTTTGTACACTTGTGTTGAAATTCGTAGGAAAATTTGTCTTC  
HCG11 GTAGTAAATTTAGCATATTTTGTATGCTTTGTGTTGAAATTCATAGGAAAATTTGTCTTC

NORAD TGTAAGACTTTTGCATAGGAATTTGTTTACCATCTCTAAGCATTACACGTGCCTGTA  
HCG11 TGTAATTGACTTTTGCATAGGAATTTGTTTACCATCTCTAAGCATTACACATGCGTGTAA

NORAD CTTGTCCACTGGATTGAAGGCAGAGAAGGAAGGGAGGAGGGAATGATTCAAGGCCAAAAT  
HCG11 CTTGTCCACTGAATTGAAGGCAGAGAAGGAAGAGAAGAGGGAATGATTCAAGGCCAAAAT

NORAD GGCCACATTTAGAAGATACCTCAGATGATAACCATTTGTTATGTGTGTGCAATTTTATTTA  
HCG11 GGTCACATTTAGAAGATACCTTAGATGATAACCATTTGTTATGTGTGTGCAATTTTATTTA

NORAD ACAGTGTGTGTATGTGGTGGACAAGTTATATGAAATATCTAGTCTTTCTAGATATTTGG  
HCG11 ACAGTGTGTGTATGTGGTGGACAAGC--TATGAAATATCTAGTCTT--TAGATATTTGG

NORAD AAGTGCTGTATGATTTTAA--AGTGGTAGTAGAATAACACTTT--GTAAATGCTTTT  
HCG11 AAGTGCTGTATGATTTTAAAGTAGTAGTAGAATAACACTTTTGTAAATGCTTTT

NORAD AAAAACTGATGGGAAATGCTGTTTGGAAAGTGAATTTGTAACACCTGGGAGGTGGGAG

HCG11 AAAAACTGATGGGAAATGCTGTTTGGAAAGTGGATTGTTGAACCACCTGGGAGGTGGGAG

NORAD GGAAGAAATGCAAAATGGTGTGTTTGGCATTGTTTATTAGAAAATTCAGCTTAATCCATT  
HCG11 GGAAAAAATGCAAAAGGTGTTTGGCATTGTTTATTAGAAAATTCAGCTTAATCCATT

NORAD GTGTATATGTTACATGCATTTTCATTTAACTTTGCTATAC TGTATATA TGTATATA TAAC  
HCG11 GCCTATATGTTACAAGCATTTCATTTAACTTTGCTATAC TGTATATA TTGTATATACT

NORAD GGACAAATAGTCCCGATTTTATAATATCTAGTCTCTAGATATTAAGAGGTTGCCAATG  
HCG11 GGACAAATGAGTCCTGATTTTATAATATCTAGTCTGTAGCTATTAAGAGGTTGCCAATG

NORAD TATGACAGAAGTAGAGTTAGTAAACTAACACATTTTGTACACTTTGTTAAAAATTTGTAGA  
HCG11 TATGACAAAAAGTA--GTTAGTAAACTAACGCATTTTGTACACTTTGTTAAAAATTCATAGA

NORAD AAGGCTGTCTTCTGAAAAGGAC-TTTTGGAAAGTGA---GATAACATCAGCTCTAAGTGAC  
HCG11 GAGGCTGTCTTCTGAAAAGGACTTTTGGAAAGTGAATGATAACATCAGCTCGAAGTGAC

NORAD AC--GTGCCTATATCCATCAGGTTGGTGGTGGAGAGGAGTTGGAAGGAATGAAGGGTTCT  
HCG11 ACATGTGCTTATATCCACCAGGTTGGTGGTGGAGAGGAGTTGGAAGGAATGAAGGGTTCT

NORAD AGACCAGAATGTTTCGTATTTAGAAGACACTATCAGATATAACCATTGTTACATGTGTGTA  
HCG11 AGACCAGAATGTTTCCTATTTAGAAGACACTTTCAGATATAACCATTGTTACATGTGTGTA

NORAD GTTTATTCAACCCTACTGT TGTATATA GCGGACAAACTTAAGTCCTTATTGAAACATCTA  
HCG11 GTTTATTCAACAGTGCTA TGTATATA GTGGACACACTTAAGTCCTTATTGAAATATCTA  
NORAD GTCTTTCTAGATGTTTAGAAGTGCACAAAGTATGTTAAAAGTAGAGGTAGTAAATAACAC  
HCG11 GTCTTTCTAGATGTTTAGAAGTGCACAAAGCATGTTAAAAGTAGAGGTAGTAAAGTAACAC

NORAD ATTTTGTAGCTATCCTTTTGATATGAAATATTGTCTTGAAATTGATCAATTCTCTGAGC  
HCG11 ATTTTGTAGTTAT---TTTGATATGAAATATTGTCTTGAAATTGATCAATTCTCTGAGA

NORAD AGTACCCATTTTGATATTTGTGCTGGTTCAGGGGGAAGGAGGAGCACAAAGTGCAAAGGG  
HCG11 AGTACACGTTATGATATTTGTGCTGGTTCAGGGGGAAGAAGGAGCACAAAGTTCAAAGGG

NORAD CTTTCTACCAGTGTCCAGTGTGTTTATGAGGAGGCACATTGACCATTGTCCCTTATGTCT  
HCG11 CTTTCTACCAGTGTCCAGTGTGTTTATGATGAGGCACATTGACCATTGTCCCTTATGTCT

NORAD GCATTTTCAATTTACTGTGCTG TGTATATA TGTATATA AGCGGACATAGGAGTCTAATT  
HCG11 GCATTTTCTGTTACTGTGCT-----G TGTATATA AGCAGACATAGGAGTCTAATT

NORAD TACGTCTAGTCGATGTTAAAAAGGTTGCCAGTATATGACAAAAGTAGAATTAGTAAACTA  
HCG11 TATATCTAGTCGATGTTAAAGAGGTTGCCAGTATATGGCAAAGTAGAGTTAGTAAACTA

NORAD CTACATTGAGTACACTTTGTGTTAAAATTCATAGGGAAGACTTCTTAAAAACA--AGTGA  
HCG11 ATACATTGAGTACACTTTGTGTTAAAATTCATAAGGAACACTTCTTAAAAACAGAAGTAA

NORAD AATTGTAAAAACCC-----CCCTAAGCATTACAGATGGCTTATAGCTGTCCACGGGGTT  
HCG11 AATTGTAAACGCCCCCGCCCCAAGCATTACAGATGGCTTATAGCTGTCAACGGGGTT

NORAD GGTAGAGGTGGGAAAGGGAAGGTTCTAGGCCAGAATGTTCCCTATTTAGAAGACACTCAA  
HCG11 GGTAGAGGTCAGAAAGGGAAGTGTCTAGGCCAGAATGTTCCCTATTTAGAAGACACTCAA

NORAD ATTACAGTCTGTGTTATGTATGTATACCATTTATTCAATGCTACTG TGTATATA ATGGAA  
HCG11 ATTATAGTCTATGTTA TGTATATA TGCCATTTATTCAATACTACTG TGTATATA ATGGAA

NORAD AACTTAAGTCCAGTTTGAACATCTAGTCTTTCTAGGTGTTTAAAAGTGTACAACGGCCT  
HCG11 AACTTAAGTGCAGTTTGAACATCTAGTCTTTCTAGGTGTTTAAAAGTGCACAATGGTCA

NORAD GTCGCAGTGGCGCATGCCTGTAATCCCAGCACTTTGGGAGGCCGAGGCAGGCGGATCAGC  
HCG11 GGTGCGGTGGCTCACTCCTGTAATCCTGGCACTTTGGGAGGCTGAGGTGGGCAGATCAGC

NORAD AGGTCAAGAGATCAGGACCATCTTGGCCAACATGGTGAAACCCCATCTTACTAAAAATA  
HCG11 AAGTCAAGGGATCGAGACTATCTTGGCCAACATGGTGAAACCCCATCTTACAAAAATA

NORAD CAAAAATTAGCTGGTCTGTTGGTGGTGGCCACCTGTAGCCCCAGTTACTCGAGAGGCTGAGG  
HCG11 CAAAAATTAGCTGGTCTGTTGGTGGTGGCCACCTGTAGCCCCAGTTACTCGAGAGGCTGAGG

NORAD CAGGAGAATCGCTTGAACCTGGGAGGCCGAAAGTTGCAGTGAGCCAAGATCGCACCACTGC  
HCG11 CAGGAGAATCGCTTGAACCTGGGAGGCCGAAAGTTGCAGTGAGCCAAGATCGCACCACTGC

NORAD ACTCCAGCCTGGCGACAGAGCGAGGCTCCGTTTCAAAAAAAAAAAG-----TGCA  
HCG11 ACTCCAGCATGGCGACAGAGCAAGACTCCATCTCAAAAAAAAAAAAAAAAAAAAAATCCA

NORAD CAATGTAGGTTAACAGTAGAGGGCTTAAAGTAACACCCCTCTAAGCATTGTTTTCAGTAC  
HCG11 CAACATAGGTTAAAAGTAGAGGGCTTAAAGTAACACCCCTCTAAGCATTGTTTTCAGTAC

NORAD TTCCTAGGAGTGGTTGCATTTGGGAATGGAATTGTTAAAACTTGATGCTTAGGAGCGAAT  
HCG11 TTCCTAGGAGTGGTTGCATTTGGGAATGGAATTGTTAAAACTTGATGCTTAGGAGCGTAT

NORAD GCAGACTATTCATTGGGTGTTGGGGTGGGGGAAGGGGGGTGGGCAGAGGAGGTATGCA  
HCG11 GCTGACTATTCAGTGCCTGG-TGGGGTGGGG-----AGGAGGAGGAGGTATGCA

NORAD GGGAGAGGGGTTCTGTGCTCCTGAG----ATTAGTTCAGATGGTCTAACCATTGTTCTAT  
HCG11 GGGAGAAGGGTCTGTGCCCTGAGTTAGATTAGTTCAGATGGTCTAACCATTGTTCTAT

NORAD ATGTGCATTTTA---GTTAATATTGTGTATTAAAGGATAA---GTCTTAATGCTCAAA  
HCG11 GTATGCATTTTATTGTGTTAATATTGTGTATTAAAGGATAAACAGTCTTAATGCTCAAA

NORAD GTATGTTAAAAATAGATGTAGTAAATCAGTCCCTTTGTGAATGTCCTTTTGTAGTTTTT  
HCG11 GTATGTTAAAAATAGATGTAGTGAATCAGTCCCTTTGTGAATGTCCTATTGTTAGTTTTT

NORAD AGGAAGGCCTGCTCCTCTGGGAGTGACCTTTATTAGTCCACCCTTGGAGCTAGACATCCT  
HCG11 AGGAAGGCCTGCTCCTCTGGGAGTGACCTTTATTAGTCCACTTCTGGAGCTAGACGTCT

NORAD GTACTTAGTCAC-GGGGATGGTGAAGAGGGAGAAGAGGAAGGGTGAAGGGAAGGGCTCT  
HCG11 ATACTTAGTCACTGGGGATGGTGAAGAGGGAGAAGAGGAAGGGCGAAGGGAAGGGCTCT

NORAD TTGCTAGTATCTCCATATCTAGACGATGGTTTTAGATGATAACCACAGGTCTACAAGAGC  
HCG11 TTGCTAGTATCTCCATTTCTAGAAGATGGTTTTAGATGATAACCACAGGTCTATATGAGC

NORAD GTTTTTAGTAAAGTGCCTGTGTTTATTGTGGACAAAAG-TTATTATTTGCAACATCTAAG  
HCG11 ATTTTTAGTAAAGTGCCTGTGTTTATTGTGGACAGAGTTTATTATTTGCAACATCTAAG

NORAD CTTTACGAAT---GGGGTGACAACCTTATGATAAAAACTAGAGCTAGTG-----  
HCG11 CTTTATGAATATCTGAGGTGACAATGTGTGATAAAAACTAGAGCTAGTGGGCCAGGCGCG

NORAD -----  
HCG11 GTGGCTCATGCCTGTAATCCCAACATTTTGGGAGGCTGAGGCAGGCAGATCACAAGGTCA

NORAD -----  
HCG11 AGAGATCGAGACCATCCTGGTCAACATGGTGAACCCCATCTCTACTAAAAATACAAAAA

NORAD -----  
HCG11 TTAGCTGGGCGTGGTGGCGCTGCTGTAGTCCCAGCTTCTCAGGAGGCTGAGGCAGGAG

NORAD -----  
HCG11 AATCACTGAACCTGGGAGGCGGAGGTTGCAGTGAGCCAATATTGCGCCACTGCACTCCA

NORAD -----AATTAG  
HCG11 GCCTGGGCAACACAGCAAGACTCCATCTCAAAAAAAAAAAAACTAGAGCTAGTGAATTAG

NORAD CCTATTGTAATAACCTTTGTTATAATTGATAG---GATACATCTTGGACATGGAATTG  
HCG11 CCAATTTGTAATAACCTTT-TTATAAGTGATAGAAAAGATGCATCTTGGACATGGAATTG

NORAD TTAAGCCACCTCTGAGCAGTGTATGTCAGGACTTGTTCATTAGGTTGGCAGCAGAGGGGC  
HCG11 TTAACCCTCTGAGCAGTATATGTCAGGACTTGTTCATTAGGTTGGCAGCAGAGGGGC

NORAD AGAAGGAATTATACAGGTAGAGATGTATGCAGATGTGTCCATATATGTCCATATTTACAT  
HCG11 AGAAGGAAGTATACAGGGAGAGATGTATGCAGATGTGTCCATATGTGTCCATATTTACAT

NORAD TTTGAT---AGCCATTGATGTATGCATCTCTT--GGCTGTACTATAAGAACACATTAA--  
HCG11 TTTGATGATAGCCATTGATGTATGCATCTCTTTGGCTGTACTATAGGAATACATTAAGT

NORAD --TTCAATGGAAATACACTTTGCTAATATTTAATGGTATAGATCTGCTAATGAATTCTC  
HCG11 AATTCAATGGAAATATACCTTGCTAATATTATAATGGTATAGCTCTGTTAATGAATTCTC

NORAD TTA AAAACA-----TACTGTATTCTGTTGCTGTGTGTTTCATTTTAAATTGAGCATT  
HCG11 TTAGAAACATTATACTTAATGTATTCTGTGCTGTATGTTTCATTTT-AATTGAGCATT

NORAD AGGGAATGCAGCATTAAATCAGA ACTCTGCCAATGCTTTTATCTAGAGGCGTGTGGCA  
HCG11 AGGGAATGCAGCATTAAATCAGA ACTCTGCCAATGCTTTTATCTAGAGGCGTGTGGCA

NORAD TTTTTGTCTTATATGAAATTTCTGTCCCAAGAAAGGCAGGATTACATCTTTTTTTTTTT  
HCG11 TTTTTGTCTTCTATGAAATTTTTGTCCCAAGAAAGGTAGGACTACA-----TTTTTT

NORAD TTTAGCAGTTTGAGTTGGTGTAGTGTATTCTTGGTTATCAGAATACTCATATAGCTTTGG  
HCG11 TTTAACAGATTAAGTTGGTGTAGTGTATTCTTGTTTATCAAAAATACTAATAAAGCTTTGG

NORAD GATTTTGAATTGGTAAATATTCATGATGTGTGAAAAATCATGATACATACTGTACAGTCT  
HCG11 GATTTTGAATTGGTAAATATTCATGATGTGTGAAAAATCATGATACATACTGTACAACT

NORAD CAGTCCATAAAAATTGGATGTTGTGCCTACACACA---GGATCTAGAAGAATATGTCAA  
HCG11 CAGTCCATAAAGATGGGATGTTGTGCCTACACACACACAGGACCTAGAAGAACATGTCAA

NORAD ACTATAAACTGCTTGTGATTGTGAATGACTTTGTTCTTTGCTT---GTGTTTTCAATTT  
HCG11 ACTGTAAACTGCTTGTGATTGTGAATGACTTTGTTGTTTGCTTCTTGTGATTTTCAGTTT

NORAD CCTATAATGCACATACTAAC-----TTTTAAAAAATAAAGGTTATTTTAAAAGCCTGT  
HCG11 CCTATAATGCACATATTAACATATTAACTTTTTAAAATAAAGGTTATTTTAAAAGCCTGT

NORAD ATTA  
HCG11 -TTA
